# Supplementary material for: Intermittent dynamics of bubble dissolution due to interfacial growth of fat crystals
Source: Royal Society of Chemistry journal article supplement (doi:10.1039/d1sm00902h), 2021-01-01
Supplement: d1sm00902h1.pdf [file d1sm00902h1.pdf]

## Intermittent dynamics of bubble dissolution due to interfacial growth of fat crystals – Supplementary Figures

Irma Liascukiene,<sup>1,\*</sup> Gabriel Amselem,<sup>1,\*</sup> Jessem Landoulsi,<sup>2</sup> Deniz Z. Gunes,<sup>3</sup> and Charles N. Baroud<sup>1,4,†</sup>

<sup>1</sup>*LadHyX, CNRS, Ecole polytechnique, Institut polytechnique de Paris, 91120, Palaiseau, France*

<sup>2</sup>*Sorbonne Université, CNRS, Laboratoire de Réactivité de Surface, LRS, 75005 Paris, France*

<sup>3</sup>*Nestlé Research Center, Food Science and Technology Department,*

*Vers-Chez-Les Blanc, CH-1000, Lausanne 26, Switzerland.*

<sup>4</sup>*Physical Microfluidics and Bioengineering, Department of Genomes and Genetics, Institut Pasteur, 75015 Paris, France*

---

\* These two authors contributed equally

† baroud@ladhyx.polytechnique.fr

## SUPPLEMENTARY FIGURES

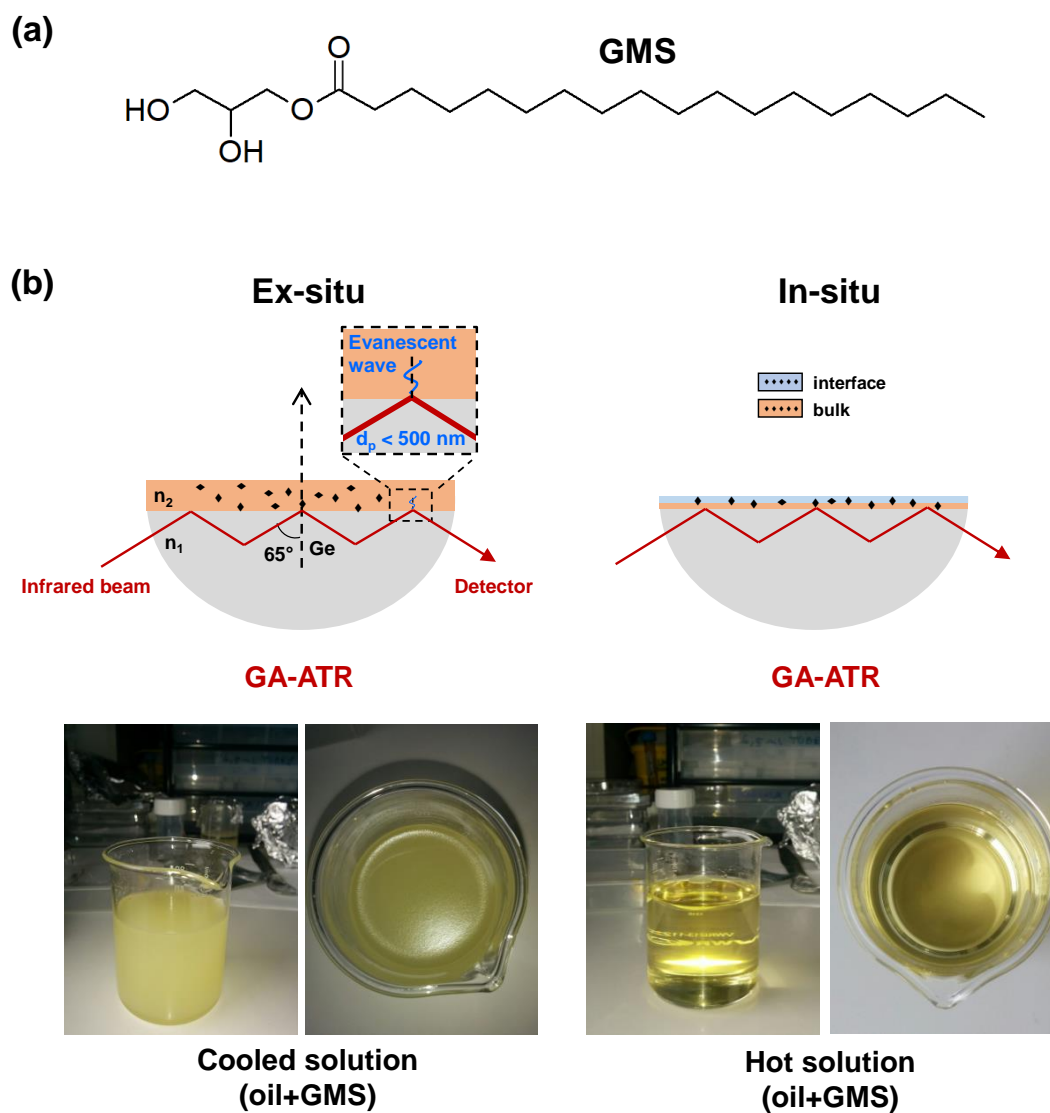

FIG. 1. (a) Chemical formula of glycerol monostearin (GMS), the main component of the “Dimodan HR” powder (Danisco); (b) Protocol of the GA-ATR experiment using the *ex situ* and *in situ* approaches.

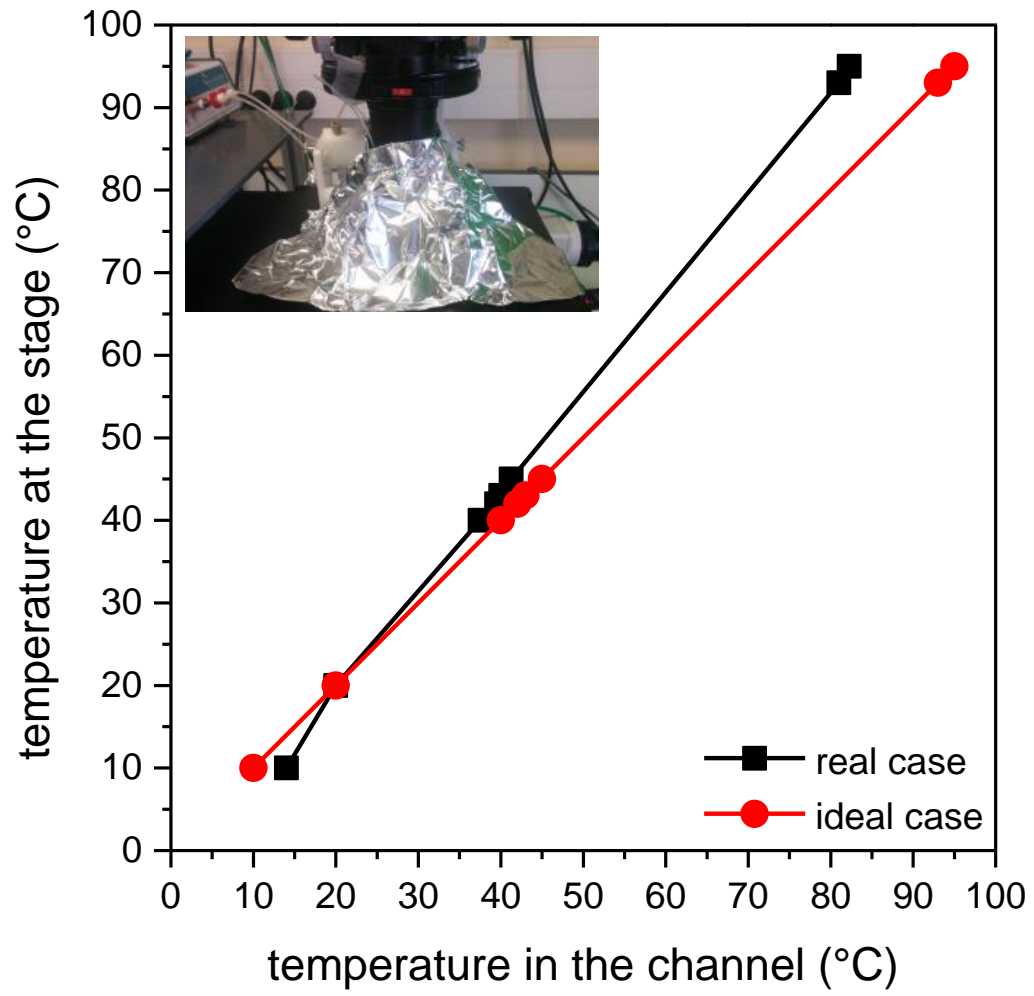

FIG. 2. Calibration curve for the temperature.

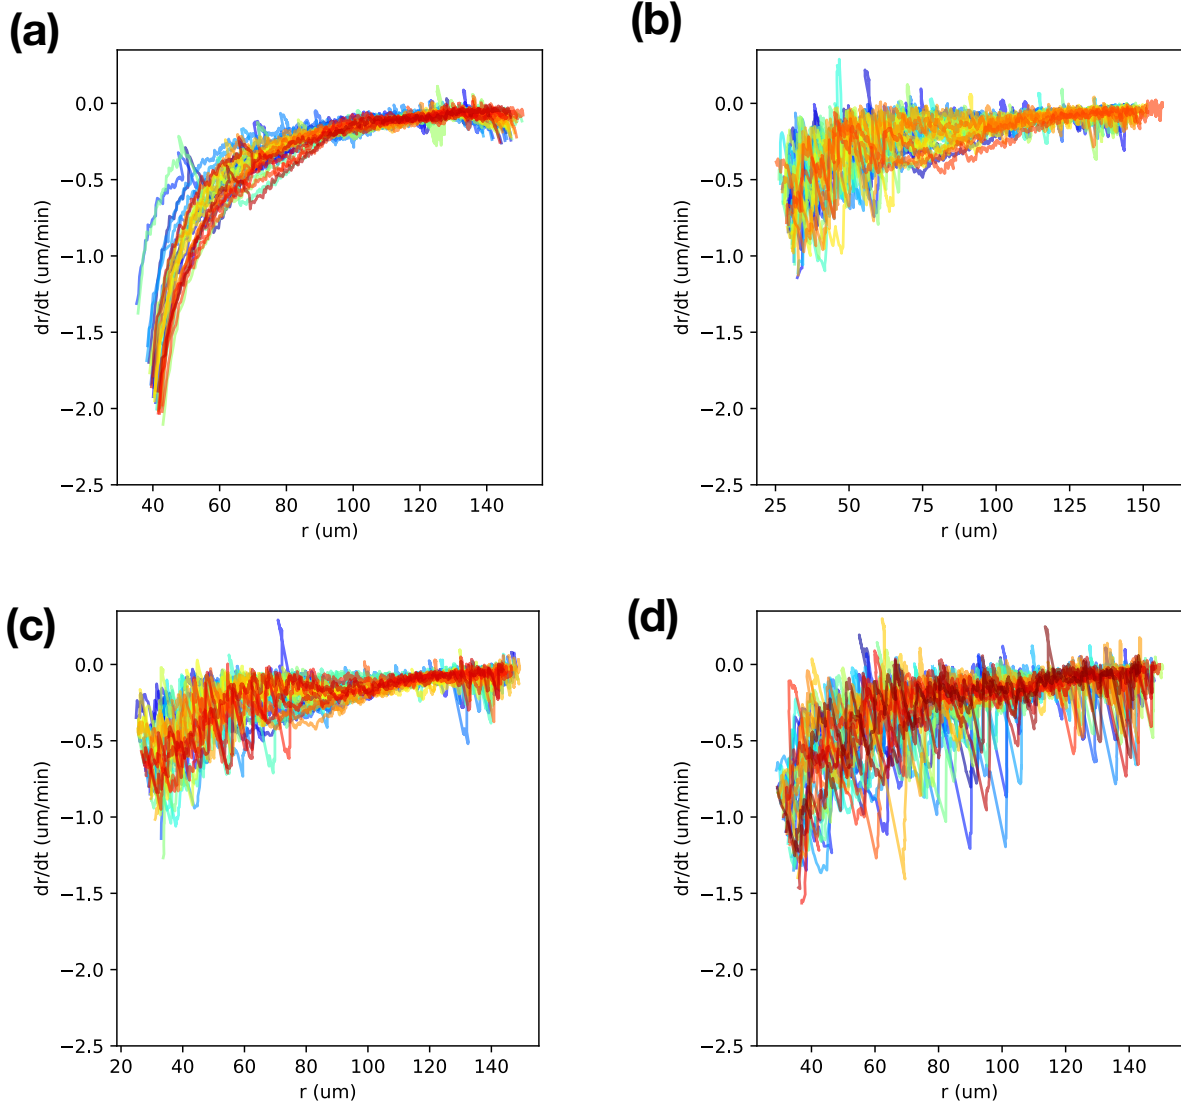

FIG. 3. Evolution of  $\dot{R}$  as a function of  $R$ , for air bubbles (a) in pure oil, (b) in oil with 1% small fat crystals, (c) in oil with 2% small fat crystals, (d) in oil with 2% large fat crystals.

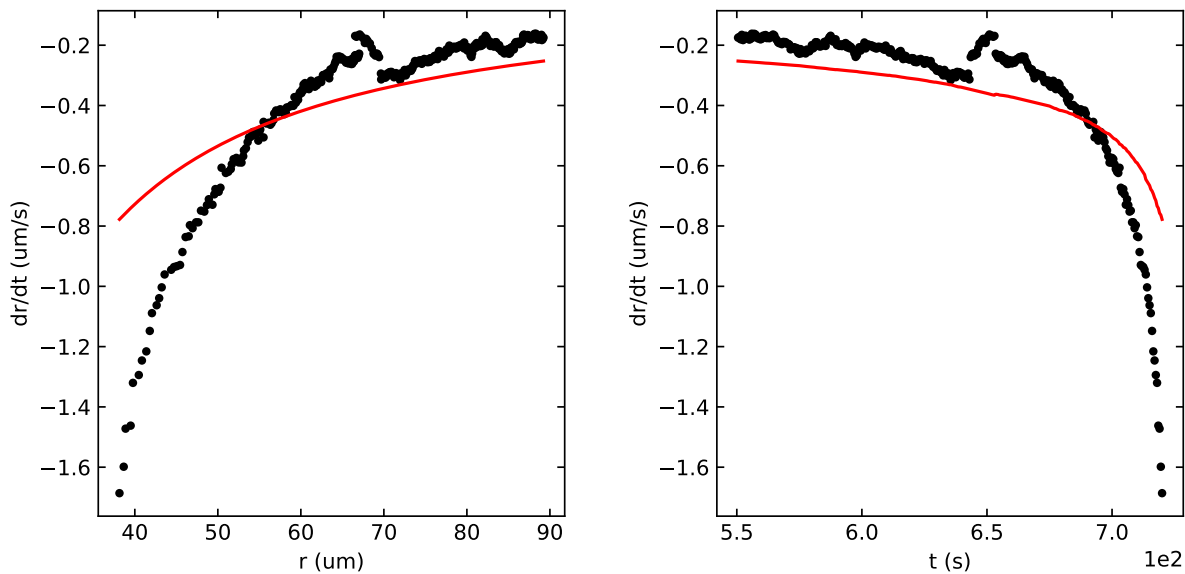

FIG. 4. Evolution of (a)  $\dot{R}$  as a function of  $R$ , and (b)  $R$  as a function of time  $t$ , for a bubble in pure oil. Black points: experimental data. Red line: best fit to the original Epstein-Plesset equation, with only one fit parameter,  $f$ . The fit is very poor.

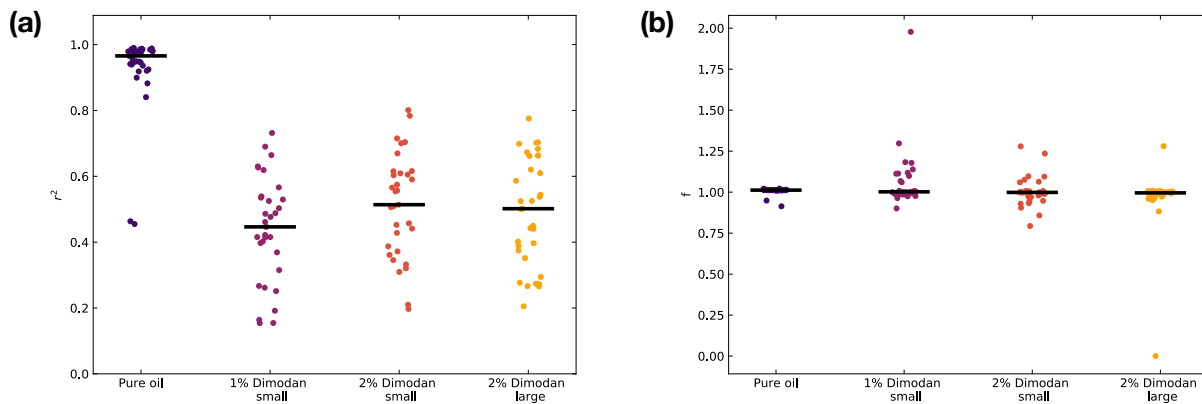

FIG. 5. (a) Values of the coefficient of determination  $r^2$  for fits to the Epstein-Plesset equation. (b) Values of the fitted value of  $f$ , the fraction of dissolved gas in the liquid at initial times compared to its saturation value for a flat interface.

**SUPPLEMENTARY MOVIES**

- **Supplementary Movie 1** shows the dissolution of an air bubble in pure oil.
- **Supplementary Movie 2** shows the dissolution of an air bubble in oil containing 2% fat crystals.
- **Supplementary Movie 3** shows the dissolution of an air bubble in oil containing 2% fat crystals, together with the evolution of the bubble radius.
